# Supplementary material for: Magneto-acoustic protein nanostructures for non-invasive imaging of tissue mechanics in vivo
Source: Nat Mater. 2023 Oct 16;23(2):290–300. doi: 10.1038/s41563-023-01688-w (PMC10837075; doi:10.1038/s41563-023-01688-w)
Supplement: Supplementary file 3 — Statistical source data for Fig. 1. [file 41563_2023_1688_MOESM3_ESM.xlsx]

## Sheet: Fig_1_j
MGV	GV	MNP	MNP+AlO3
134.71	16.7	6.72	32.87
97.5	16.7	47.3	40.9
120.5	1.6	23.5	6.02
87.8	1.5	25.1	26.4

## Sheet: Fig_1_k
	MGV			GV			MNP
7	4.96	3.52	3.38	6.1	1.4	1.5	1.12	1.19	1.23
10	7.27	9.45	11.3	4.7	1.48	1.55	1.16	1.3	1.3
20	24.56	39.9	31.78	1.53	1.41	5.1	1.45	1.3	0.9
30	107.5	120.5	68.8	4.3	1.4	14.7	1.31	47.3	25.7

## Sheet: Fig_1_l
	MGV			GV			MNP
0.05	11.6	7.5	8.32	3	4.5	5.5	0.9	1.98	2
0.1	15.33	32.82	22.26	11.4	5.7	6.5	4.46	4.9	4.5
0.2	75.7	46.2	37.9	12.1	1.3	8.9	12.1	10.9	9.89
0.4	88.9	115.1	128.7	16.7	3.1	7.1	1.31	47.3	26.6
