# Supplementary material for: Magneto-acoustic protein nanostructures for non-invasive imaging of tissue mechanics in vivo
Source: Nat Mater. 2023 Oct 16;23(2):290–300. doi: 10.1038/s41563-023-01688-w (PMC10837075; doi:10.1038/s41563-023-01688-w)
Supplement: Supplementary file 4 — Statistical source data for Fig. 2. [file 41563_2023_1688_MOESM4_ESM.xlsx]

## Sheet: Fig_2_c
	MGV				GV				MNP
0.1	120.512	68.723	178.734	68.835	16.7155	16.7367	1.6489	11.6182	20.3169	8.7217	47.3016	22.701
0.15	30.704	97.367	17.436	82.1623	8.1	13.532	10.4992	10.6919	10.1993	3.2739	9.5012	7.6499
0.2	40.323	8.257	18.9143	7.5236	7.278	10.682	7.4092	8.4214	4.0011	3.3991	1.3018	2.5412
0.5	14.013	7.897	7.315	8.423	7.848	3.3125	10.0984	4.8126	3.4383	2.3011	1.3982	2.3734

## Sheet: Fig_2_e
	0.05					0.1					0.2					0.4					0.8
63	36.3015	34.1187	23.418	20.5987	41.8298	64.5433	56.4482	60.3989	66.782	54.1176	136.488	86.2126	77.8963	82.7764	118.017	94.8996	125.126	138.713	160.592	274.591	148.292	354.302	193.26	277.783	265.884
74	11.5998	7.49876	8.3228	8.50013	9.78903	20.4162	15.3327	32.8213	22.2644	16.7982	75.4321	46.2153	17.9174	95.7592	86.4261	126.813	95.4986	120.546	68.6878	179.285	145.527	106.298	174.533	187.431	131.406
321	4.60798	16.1018	2.84986	9.24582	6.4863	7.31865	39.3182	3.41572	3.1665	13.3729	17.8592	75.0943	15.763	11.1082	29.9392	68.2853	21.8265	30.7868	94.3129	16.4002	36.7283	48.8853	83.8874	78.6187	59.2286
564	4.1197	1.9986	2.1119	1.5499	3.8864	13.1186	8.8852	7.1106	3.4423	2.83623	18.0121	6.63964	5.41637	7.5813	12.5421	7.5127	7.2127	39.3348	8.29231	18.8837	28.4839	25.9572	29.1995	38.1028	31.2732
5828	4.6958	6.0331	1.77852	4.36392	3.94162	6.4972	6.4391	3.9934	2.78321	4.9743	13.9529	11.1148	14.1899	6.3281	8.0126	8.40923	9.10126	14.0173	7.81224	7.3168	18.7549	17.784	28.8894	27.5234	29.1724
