# Supplementary material for: Magneto-acoustic protein nanostructures for non-invasive imaging of tissue mechanics in vivo
Source: Nat Mater. 2023 Oct 16;23(2):290–300. doi: 10.1038/s41563-023-01688-w (PMC10837075; doi:10.1038/s41563-023-01688-w)
Supplement: Supplementary file 7 — Statistical source data for Fig. 5. [file 41563_2023_1688_MOESM7_ESM.xlsx]

## Sheet: Fig_5_c
	-			+
MGV	33.9194	30.1867	29.4271	7.62188	5.79245	3.1825
GV	3.0167	3.4295	2.0972	2.6881	3.12015	3.06792
MNP	3.33321	3.0172	4.1757	4.2286	3.1195	2.1327

## Sheet: Fig_5_f
MGV	GV	MNP
35.741	3.252	4.12
40.2	8.282	4.852
46.8	2.041	10.444
32.22	2.66	5.414
30.63	4.104	4.28
