# Supplementary material for: Magneto-acoustic protein nanostructures for non-invasive imaging of tissue mechanics in vivo
Source: Nat Mater. 2023 Oct 16;23(2):290–300. doi: 10.1038/s41563-023-01688-w (PMC10837075; doi:10.1038/s41563-023-01688-w)
Supplement: Supplementary file 8 — Statistical source data for Fig. 6. [file 41563_2023_1688_MOESM8_ESM.xlsx]

## Sheet: Fig_6_c
Normal	Fibrosis
18.5833	4.535
17.25	2.76875
11.6562	3.4
8.77273	4.72
	5
	5.64516
	3.625

## Sheet: Fig_6_f
Normal	Fibrosis
326.326	330.98
198.24	436.213
229.376	429.828
137.759	701.89
	575.586
	662.254
	311.576
