# Supplementary material for: Magneto-acoustic protein nanostructures for non-invasive imaging of tissue mechanics in vivo
Source: Nat Mater. 2023 Oct 16;23(2):290–300. doi: 10.1038/s41563-023-01688-w (PMC10837075; doi:10.1038/s41563-023-01688-w)
Supplement: Supplementary file 10 — Statistical source data for Extended Data Fig. 2. [file 41563_2023_1688_MOESM10_ESM.xlsx]

## Sheet: Extanded Data Fig_2
	Relative organoid area
Day	Normal					10 ng/ml TGF-β					50 ng/ml TGF-β
0	1	1	1	1	1	1	1	1	1	1	1	1	1	1	1
3	1.69967	1.31761	1.45528	1.75904	1.77624	2.04	1.875	2.27551	2.42857	1.40278	1.82708	2.44444	1.77931	1.58937	1.72277
5	2.13201	1.44654	1.79675	2.07229	2.22652	2.21538	2.23958	2.42517	1.52381	1.06944	2.1043	3.28395	1.96207	1.62802	1.57426
7	2.38174	1.43396	2.00813	2.21687	2.36464	1.25538	1.97917	2.13265	1.11905	0.736111	1.80055	2.19753	1.46897	1.2029	1.30693
9	2.85148	1.38679	2.44715	3.12048	2.35912	0.944615	1.61458	1.51361	0.535714	0.763889	0.881976	1.18518	0.658621	0.415459	1.0396
11	2.85919	1.26415	2.57724	3.45783	2.04972	1.11077	1.36458	1.36395	0.47619	0.541667	0.4785	0.814815	0.389655	0.227053	0.792079
13	3.54015	1.20126	3.21951	5.33735	1.92818	1.27692	1.48958	2.14286	0.559524	0.541667	0.337603	0.790123	0.289655	0.188406	0.930693
15	3.40814	0.880503	3.66667	7.96385	1.55249	1.53846	1.67708	2.20748	0.440476	0.486111	0.226898	0.790123	0.244828	0.115942	0.742574
